# Supplementary material for: Protein arginine methyltransferase 2 controls inflammatory signaling in acute myeloid leukemia
Source: PubMed Central journal article supplement (PMC11190286; doi:10.1038/s42003-024-06453-6), 2024-06-20
Supplement: 42003_2024_6453_MOESM3_ESM.pdf [file 42003_2024_6453_MOESM3_ESM.pdf]

## Description of Additional Supplementary Files

**File name:** Supplementary data 1

**Description:** The source data behind the graphs in the paper
